# Supplementary material
Source: Springer Nature journal article supplement (https://www.springermedizin.de/resource/supplementary/13041_2014_291_MOESM12_ESM.pdf/25657922)

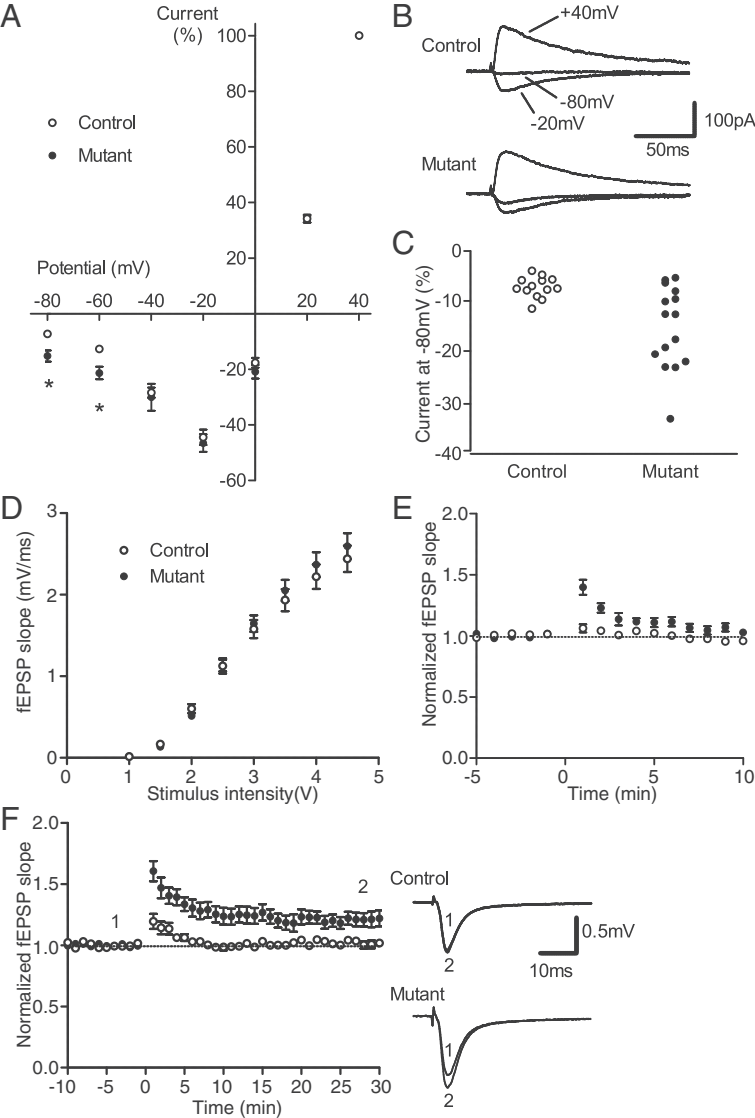

Supplement: MOESM12 [file 25657922]
